# Supplementary material
Source: PubMed Central journal article supplement (PMC4794005)
Supplement: salj023399.ww1_default.pdf [file salj023399.ww1_default.pdf]

## **Appendix 1: Search Strategy** [posted as supplied by author]

### **#1**

Search ("neurobehavioral manifestations"[MeSH Terms] OR "delirium"[MeSH Terms] OR "confusion"[MeSH Terms] OR "psychomotor agitation"[MeSH Terms] OR "cognition"[MeSH Terms] OR "psychotic disorders"[MeSH Terms])

AND

("intensive care units"[MeSH Terms] OR "intensive care"[MeSH Terms] OR "critical care"[MeSH Terms] OR "sepsis"[MeSH Terms] OR "respiratory distress syndrome, adult"[MeSH Terms] OR "respiration, artificial"[MeSH Terms] OR "multiple organ failure"[MeSH Terms])

### **#2**

Search ("ICU syndrome"[Title/Abstract] OR "Intensive Care Unit Syndrome"[Title/Abstract] OR "ICU psychosis"[Title/Abstract] OR "Intensive Care Unit Psychosis"[Title/Abstract] OR "organic brain syndrome"[Title/Abstract] OR delirium[Title/Abstract] OR delirious[Title/Abstract] OR confusion[Title/Abstract] OR "confusional state"[Title/Abstract] OR encephalopathy[Title/Abstract] OR cognitive[Title/Abstract] OR neurocognitive[Title/Abstract] OR psychological[Title/Abstract] OR psychiatric[Title/Abstract] OR psychotic[Title/Abstract] OR psychosis[Title/Abstract] OR "mental status"[Title/Abstract])

AND

(ICU[Title/Abstract] OR "intensive care unit"[Title/Abstract] OR "intensive care"[Title/Abstract] OR "critical care"[Title/Abstract] OR "critically ill"[Title/Abstract] OR "sepsis"[Title/Abstract] OR "acute respiratory distress"[Title/Abstract] OR "mechanical ventilation"[Title/Abstract] OR "multiple organ failure"[Title/Abstract])

**Search #1 OR #2**
