# Supplementary material
Source: PubMed Central journal article supplement (PMC4794005)
Supplement: salj023399.ww2_default.pdf [file salj023399.ww2_default.pdf]

**Appendix 2:** Characteristics of included studied [posted as supplied by author]

| Author                                   | Country                   | Type of ICU             | Data Collection Period                  | Study design       | Multicenter enrollment | No. of patients enrolled | Duration of follow up | Multivariable model to adjust association between delirium and mortality? | Study quality (NOS unless otherwise stated) |
|------------------------------------------|---------------------------|-------------------------|-----------------------------------------|--------------------|------------------------|--------------------------|-----------------------|---------------------------------------------------------------------------|---------------------------------------------|
| Kishi et al, 1995                        | Japan                     | Medical and surgical    | Mar 1993-<br>May 1993                   | Prospective cohort | No                     | 238                      | Hospital Stay         | No                                                                        | 8                                           |
| Aldemir et al, 2001                      | Turkey                    | Medical and surgical    | Jan 1996 –<br>Jan 1997                  | Prospective cohort | No                     | 818                      | NR                    | No                                                                        | 5                                           |
| Dubois et al, 2001                       | Canada                    | Medical and surgical    | Nov 1998 –<br>Apr1999                   | Prospective cohort | No                     | 198                      | Hospital Stay         | Yes                                                                       | 7                                           |
| Ely et al, 2004; Milbrandt et al, 2004   | USA                       | Mechanically ventilated | Feb 2000 -<br>May 2001                  | Prospective cohort | No                     | 224                      | 180 days              | Yes                                                                       | 7                                           |
| Lin et al, 2004                          | Taiwan                    | Mechanically ventilated | Oct 2002 –<br>May 2003                  | Prospective cohort | No                     | 102                      | 60 days               | Yes                                                                       | 6                                           |
| Micek et al, 2005                        | USA                       | Mechanically ventilated | Mar – Aug<br>2003                       | Prospective cohort | No                     | 93                       | Hospital Stay         | No                                                                        | 5                                           |
| Roberts et al, 2005                      | Australia;<br>New Zealand | Medical and surgical    | 6 Months                                | Prospective cohort | Yes                    | 185                      | Hospital Stay         | No                                                                        | 6                                           |
| Thomason et al, 2005                     | USA                       | Medical                 | Feb 2002 -<br>Jan 2003                  | Prospective cohort | No                     | 261                      | Hospital Stay         | Yes                                                                       | 8                                           |
| Ranhoff et al, 2006                      | Italy                     | Surgical                | Jan 15, 2003<br>– Apr 15,<br>2004       | Prospective cohort | No                     | 401                      | Hospital Stay         | Yes                                                                       | 7                                           |
| Balas et al, 2007                        | USA                       | Surgical                | Aug 22, 2004<br>– Dec 31,<br>2004       | Prospective cohort | No                     | 114                      | Hospital Stay         | No                                                                        | 6                                           |
| Marquis et al, 2007; Ouimet et al, 2007a | Canada                    | Medical and surgical    | Dec 2003 –<br>Aug 2004                  | Prospective cohort | No                     | 537                      | Hospital Stay         | Yes                                                                       | 8                                           |
| Ouimet et al, 2007b                      | Canada                    | Medical and surgical    | Dec 2003 –<br>Aug 2004                  | Prospective cohort | No                     | 764                      | Hospital Stay         | Yes                                                                       | 8                                           |
| Plaschke et al, 2008                     | Germany                   | Medical and surgical    | Apr – Oct<br>2005                       | Prospective cohort | No                     | 37                       | 2 days                | No                                                                        | 6                                           |
| Angles et al, 2008                       | USA                       | Trauma ICU              | May – Aug<br>2007                       | Prospective cohort | No                     | 69                       | Hospital Stay         | Yes                                                                       | 7                                           |
| Lin et al, 2008                          | Taiwan                    | Medical and surgical    | Oct 2002 –<br>May 2003                  | Prospective cohort | No                     | 151                      | Hospital Stay         | Yes                                                                       | 8                                           |
| Van Rompaey et al, 2008                  | Belgium                   | Medical and surgical    | Jan - Apr<br>2007 and Jan<br>- Apr 2008 | Prospective cohort | Yes                    | 172                      | 180 days              | No                                                                        | 6                                           |
| Lat et al, 2009                          | USA                       | Surgical and trauma     | N/A                                     | Prospective cohort | Yes                    | 134                      | Hospital Stay         | No                                                                        | 5                                           |
| Page et al, 2009                         | UK                        | Medical and surgical    | Nov 9, 2010<br>– Sep 21,<br>2012        | Prospective cohort | No                     | 71                       | Hospital Stay         | No                                                                        | 6                                           |
| Spronk et al, 2009                       | Netherlands               | Medical and surgical    | 3 months                                | Prospective cohort | No                     | 46                       | NR                    | No                                                                        | 7                                           |
| Van Rompaey et al, 2009                  | Belgium                   | Medical and surgical    | Jul-Aug 2006                            | Prospective cohort | Yes                    | 523                      | NR                    | Yes                                                                       | 8                                           |

|                                    |               |                                         |                                                    |                             |     |      |                                                    |     |                             |
|------------------------------------|---------------|-----------------------------------------|----------------------------------------------------|-----------------------------|-----|------|----------------------------------------------------|-----|-----------------------------|
| van den Boogaard et al, 2010       | Netherlands   | Medical and surgical                    | Feb 2008 – Feb 2009                                | Prospective cohort          | No  | 1740 | 24 hrs                                             | No  | 5                           |
| Tsuruta et al, 2010                | Japan         | Medical and surgical                    | Apr 1 - Jun 30, 2008                               | Prospective cohort          | No  | 103  | ICU stay                                           | Yes | 6                           |
| Shehabi et al, 2010                | 5 countries   | Medical and surgical                    | Mar 2005 – Aug 2007                                | Randomized controlled trial | Yes | 354  | 48 after extubation or until cessation of sedation | Yes | Cochrane ROB tool: low risk |
| Salluh et al, 2010                 | 11 countries  | Medical and surgical                    | Nov 27, 2009                                       | Prospective cohort          | Yes | 232  | 24 hrs                                             | Yes | 7                           |
| Heymann et al, 2010                |               | Medical and surgical                    | Mid-Aug - Mid-Nov 2006 and mid- Feb - mid-May 2007 | Prospective cohort          | No  | 418  | ICU stay                                           | No  | 6                           |
| Girard et al, 2010                 | USA           | Mechanically ventilated                 | Oct 2003 – Mar 2006                                | Prospective cohort          | No  | 77   | 12 months                                          | No  | 5                           |
| van den Boogaard et al, 2011       | Netherlands   | Medical and surgical                    | Feb 2008 - Feb 2009                                | Prospective cohort          | No  | 1613 | Hospital Stay                                      | No  | 6                           |
| van den Boogaard et al, 2012 (CCM) | Netherlands   | Medical and surgical                    | Feb 1, 2008 – Feb 1, 2009                          | Prospective cohort          | No  | 915  | 18 months                                          | No  | 6                           |
| Sharma et al, 2012                 | USA           | Medical and surgical                    | Mid-Oct 2008 – Jan 2009 and Mar 2009 – Jun 2009    | Prospective cohort          | No  | 140  | Hospital stay                                      | No  | 6                           |
| Tomasi et al, 2011                 | Brazil        | Medical and surgical                    | May -Nov 2008                                      | Prospective cohort          | No  | 162  | Hospital Stay                                      | No  | 7                           |
| Serafim et al, 2012                | Brazil        | Surgical                                | Nov 2005 - Jul 2006                                | Prospective cohort          | No  | 467  | Hospital Stay                                      | Yes | 7                           |
| Tsuruta et al, 2014                | Japan         | Mechanically ventilated                 | Jun 1 - Jul 31, 2011 and Oct 1 – Nov 30, 2011      | Prospective cohort          | No  | 180  | ICU stay                                           | Yes | 7                           |
| Almeida et al, 2014                | Brazil        | Mechanically ventilated cancer patients | Feb 2010 - Feb 2012                                | Prospective cohort          | No  | 170  | Hospital Stay                                      | Yes | 7                           |
| van den Boogaard et al, 2014       | Netherlands   | Medical and surgical                    | Aug 1, 2010 – Aug 1, 2011                          | Prospective cohort          | Yes | 1824 | ICU Stay                                           | Yes | 7                           |
| Lahariya et al, 2014               | India         | Medical                                 | May 16 – Jul 16, 2010                              | Prospective cohort          | No  | 309  | Hospital Stay                                      | Yes | 7                           |
| Pisani et al, 2009                 | USA           | Medical and surgical                    | Sep 5, 2002 - Sep 2004                             | Prospective cohort          | No  | 309  | 12 months                                          | Yes | 7                           |
| Pandharipande et al, 2013          | USA           | Medical and surgical                    | Aug 2004 – Apr 2006                                | Prospective cohort          | No  | 821  | 3 and 12 months                                    | Yes | 8                           |
| Brummel et al, 2014                | USA           | Medical and surgical                    | Oct 2003 - Mar 2006                                | Prospective cohort          | No  | 126  | 3 and 12 months                                    | Yes | 8                           |
| Wolters et al, 2013                | Netherlands   | Medical and surgical                    | Jul 2009 – Aug 2011                                | Prospective cohort          | No  | 1101 | 12 months                                          | Yes | 7                           |
| Mehta et al, 2014                  | North America | Mechanically ventilated                 | Jan 2008 – Jul 2011                                | Randomized controlled trial | Yes | 420  | Hospital Stay                                      | Yes | Cochrane ROB tool: low risk |

|                               |             |                      |                     |                    |    |      |               |     |   |
|-------------------------------|-------------|----------------------|---------------------|--------------------|----|------|---------------|-----|---|
| Klein Klouwenberg et al, 2014 | Netherlands | Medical and surgical | Jan 2011 – Jul 2013 | Prospective cohort | No | 1112 | ICU stay      | Yes | 7 |
| Yamaguchi et al, 2014         | Japan       | Medical and surgical | N/A                 | Prospective cohort | No | 126  | Hospital stay | Yes | 7 |

APACHE II - Acute Physiology and Chronic Health disease Classification System II; CAM -Confusion Assessment Method; CAM-ICU - Confusion Assessment Method for intensive care unit; DSM III-R - Diagnostic and Statistical Manual of Mental Disorders III R; DDS - Delirium Detection Score; ICDS - Intensive Care Delirium Screening Checklist; SAS- Riker Sedation-Agitation Scale; GCS - Glasgow Coma Scale. NOS, Newcastle-Ottawa Scale. ROB, Cochrane Risk of Bias tool.
